# Supplementary material
Source: publisher figshare collection journal article supplement (https://karger.figshare.com/ndownloader/files/20066345)
Supplement: Supplementary file 1 [file 20066345]

**Supplements**

- Heat map (colors representing prostate cancer index lesions according to their quantities) of

- MRI defined index-lesion locations plotted on a sagittal T2 image

- Histopathological confirmed index-lesion locations plotted on a sagittal T2 image
